# Supplementary material for: Infectious salmon anaemia virus (ISAV) mucosal infection in Atlantic salmon
Source: Springer Nature journal article supplement (doi:10.1186/s13567-015-0265-1), 2015-10-21

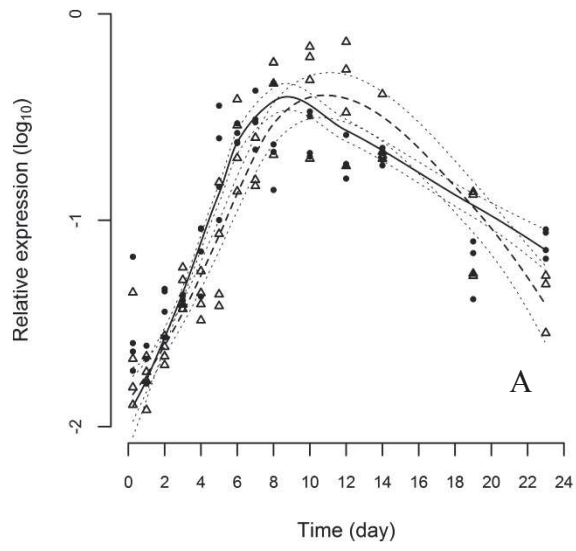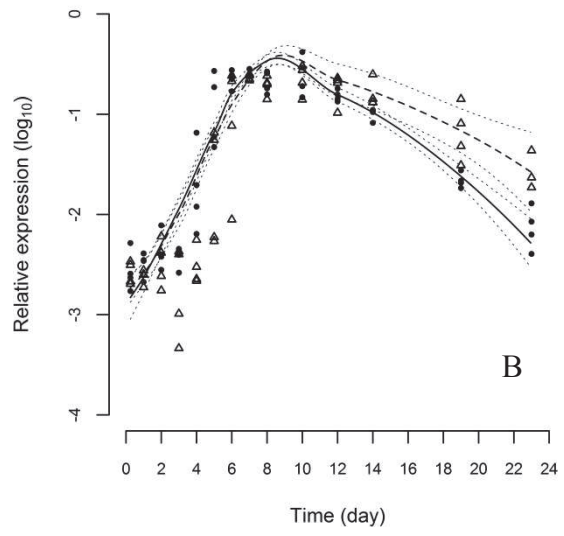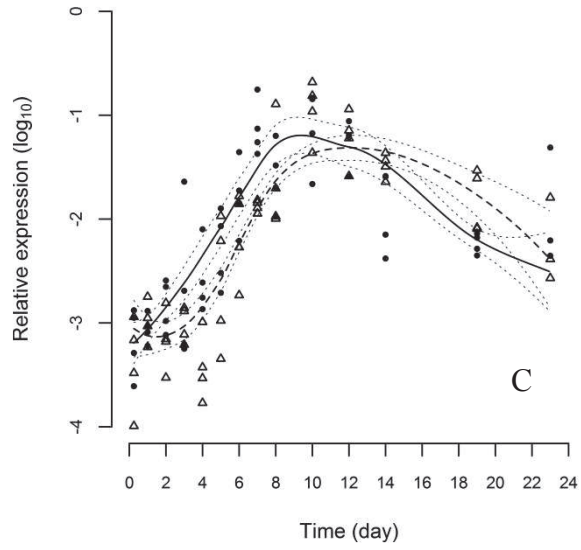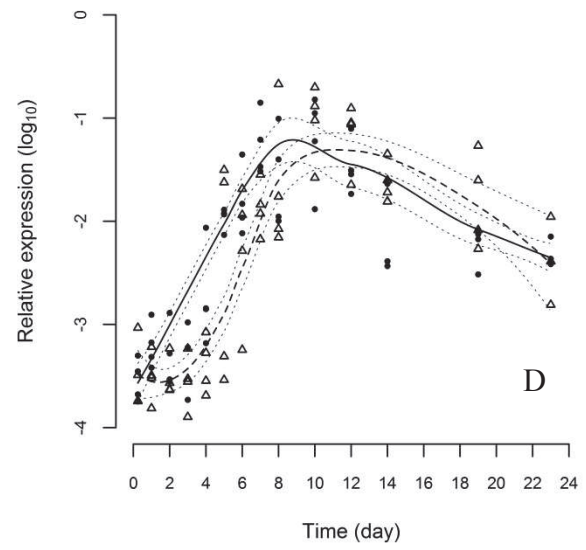

Supplement: MOESM1 [file 13567_2015_265_MOESM1_ESM.pdf]
